# Supplementary material for: Mapping the Kinetic Barriers of a Large RNA Molecule's Folding Landscape
Source: PubMed Central journal article supplement (PMC3934814; doi:10.1371/journal.pone.0085041), 2014-02-25
Supplement: pone.0085041.s002.pdf [file pone.0085041.s002.pdf]

Supporting Information, **Figure S2**

Title: Mapping the kinetic barriers of a large RNA molecule's folding landscape

Authors: Jörg C. Schlatterer, Joshua S. Martin, Alain L. Laederach, Michael Brenowitz

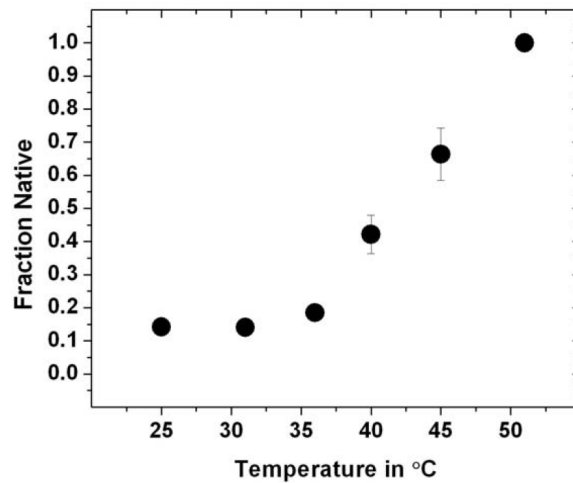

**Figure S2.** Fraction native of the L-21 Sca I RNA at a given temperature determined by standard activity assays<sup>1</sup>. All experiments were repeated three times and averaged. Fraction native was normalized to the 51°C data. Error bars for 25, 31, and 36°C data overlap with the symbol.

(1) Russell, R.; Herschlag, D. *J Mol Biol* 1999, 291, 1155.
