# Supplementary material for: Mapping the Kinetic Barriers of a Large RNA Molecule's Folding Landscape
Source: PubMed Central journal article supplement (PMC3934814; doi:10.1371/journal.pone.0085041), 2014-02-25
Supplement: pone.0085041.s004.pdf [file pone.0085041.s004.pdf]

Supporting Information, **Figure S4**

Title: Mapping the kinetic barriers of a large RNA molecule's folding landscape

Authors: Jörg C. Schlatterer, Joshua S. Martin, Alain L. Laederach, Michael Brenowitz

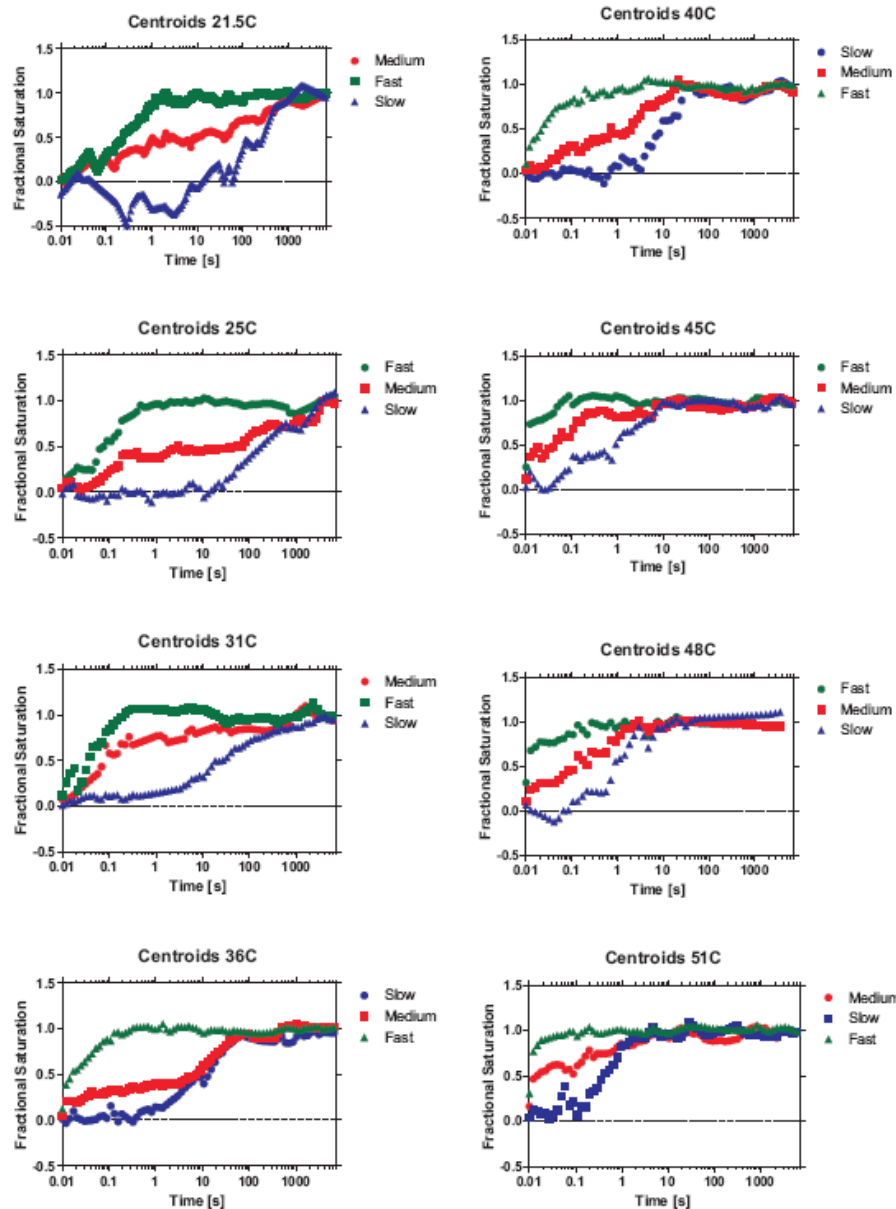

**Figure S4.** Mean cluster centroids for folding of the L-21 T. thermophila group I intron at eight temperatures used for this study. The fast, medium and slow folding clusters are shown in green, red and blue, respectively.
