# Supplementary material for: Mapping the Kinetic Barriers of a Large RNA Molecule's Folding Landscape
Source: PubMed Central journal article supplement (PMC3934814; doi:10.1371/journal.pone.0085041), 2014-02-25
Supplement: pone.0085041.s005.pdf [file pone.0085041.s005.pdf]

Supporting Information, **Figure S5**

Title: Mapping the kinetic barriers of a large RNA molecule's folding landscape

Authors: Jörg C. Schlatterer, Joshua S. Martin, Alain L. Laederach, Michael Brenowitz

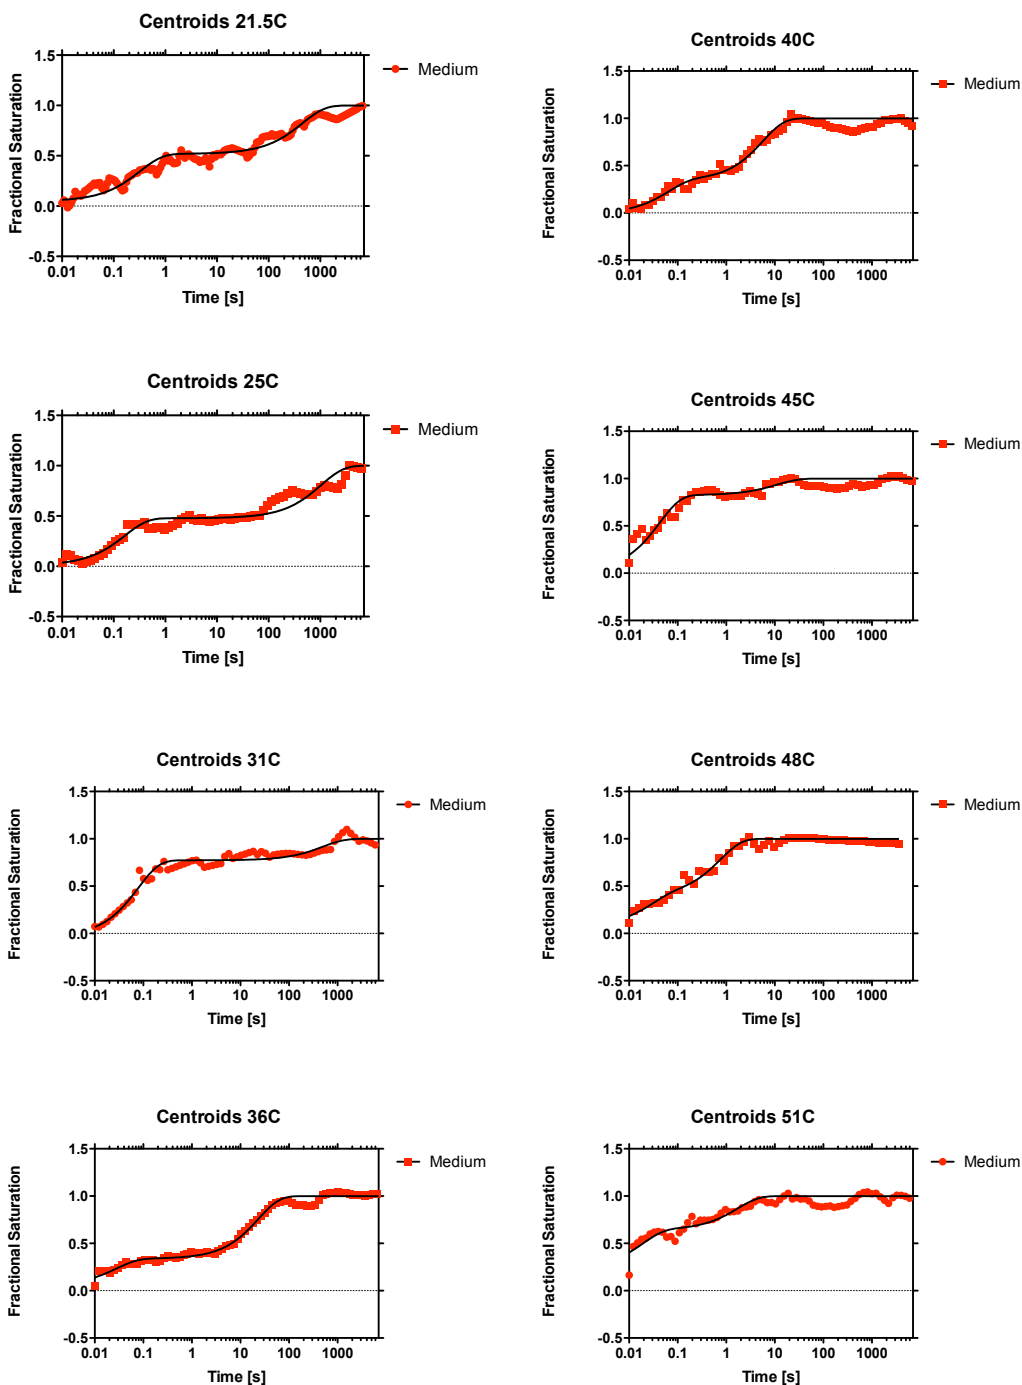

**Figure S5.** Fitting of the medium cluster. Red dots indicate the raw data of the cluster centroid, the black line shows the bi-exponential fit of the data to equation 3.
