# Supplementary material for: Mapping the Kinetic Barriers of a Large RNA Molecule's Folding Landscape
Source: PubMed Central journal article supplement (PMC3934814; doi:10.1371/journal.pone.0085041), 2014-02-25
Supplement: pone.0085041.s007.pdf [file pone.0085041.s007.pdf]

Supporting Information, **Table S1**

Title: Mapping the kinetic barriers of a large RNA molecule's folding landscape

Authors: Jörg C. Schlatterer, Joshua S. Martin, Alain L. Laederach, Michael Brenowitz

|         |      | k-values in s <sup>-1</sup> |         |                  |                  |
|---------|------|-----------------------------|---------|------------------|------------------|
|         |      | Fast                        | Slow    | Medium (Phase 1) | Medium (Phase 2) |
| T in °C | 21.5 | 2.817                       | 0.00308 | 3.101            | 0.002            |
|         | 25   | 6.699                       | 0.0031  | 6.044            | 0.001            |
|         | 31   | 18.35                       | 0.015   | 12.8             | 0.002            |
|         | 36   | 27.87                       | 0.0575  | 35.5             | 0.043            |
|         | 40   | 20.75                       | 0.0697  | 38.22            | 0.4              |
|         | 45   | 76.26                       | 0.46    | 50               | 3.081            |
|         | 48   | 56                          | 0.6792  | 36.37            | 1.327            |
|         | 51   | 90.24                       | 1.651   | 53.1             | 0.5827           |

|         |      | Error of k-values |        |                  |                  |
|---------|------|-------------------|--------|------------------|------------------|
|         |      | Fast              | Slow   | Medium (Phase 1) | Medium (Phase 2) |
| T in °C | 21.5 | 0.1126            | 0.0003 | 0.3197           | 0.0001           |
|         | 25   | 0.4578            | 0.0003 | 1.026            | 0.0001           |
|         | 31   | 1.621             | 0.0014 | 1.223            | 0.0004           |
|         | 36   | 1.993             | 0.0041 | 10.55            | 0.0025           |
|         | 40   | 2.239             | 0.0045 | 25.39            | 0.073            |
|         | 45   | 11.49             | 0.0434 | 22.23            | 1.002            |
|         | 48   | 4.68              | 0.0502 | 15.07            | 0.496            |
|         | 51   | 5.56              | 0.0913 | 25.59            | 0.124            |

**Table S1.** Rates of progression of the fast, slow and medium cluster centroids at different temperatures.
