# Supplementary material for: Mapping the Kinetic Barriers of a Large RNA Molecule's Folding Landscape
Source: PubMed Central journal article supplement (PMC3934814; doi:10.1371/journal.pone.0085041), 2014-02-25
Supplement: pone.0085041.s008.pdf [file pone.0085041.s008.pdf]

Supporting Information, **Table S2**

Title: Mapping the kinetic barriers of a large RNA molecule's folding landscape

Authors: Jörg C. Schlatterer, Joshua S. Martin, Alain L. Laederach, Michael Brenowitz

|         |      | k-values in s <sup>-1</sup> |           |           |           |
|---------|------|-----------------------------|-----------|-----------|-----------|
|         |      | U→I1                        | U→I2      | I1→F      | I2→F      |
| T in °C | 21.5 | 2.56E+000                   | 1.50E+000 | 4.83E-003 | 1.66E-003 |
|         | 25   | 3.99E+000                   | 4.45E+000 | 8.43E-003 | 1.58E-003 |
|         | 31   | 1.16E+001                   | 5.55E+000 | 4.10E-002 | 4.20E-003 |
|         | 36   | 1.06E+001                   | 2.06E+001 | 2.61E-001 | 4.29E-002 |
|         | 40   | 1.06E+001                   | 1.67E+001 | 2.96E-002 | 1.29E-001 |
|         | 45   | 3.28E+001                   | 3.43E+001 | 2.75E-001 | 4.25E+000 |
|         | 48   | 2.79E+001                   | 3.20E+001 | 3.29E-001 | 1.35E+000 |
|         | 51   | 5.10E+001                   | 3.56E+001 | 2.59E+000 | 1.04E+000 |

|         |      | Error of k-values |           |           |           |
|---------|------|-------------------|-----------|-----------|-----------|
|         |      | U→I1              | U→I2      | I1→F      | I2→F      |
| T in °C | 21.5 | 3.78E-016         | 2.20E-016 | 7.38E-019 | 4.46E-019 |
|         | 25   | 7.56E-016         | 1.07E-015 | 1.35E-018 | 3.69E-019 |
|         | 31   | 2.64E-015         | 6.93E-016 | 7.87E-018 | 1.11E-018 |
|         | 36   | 3.78E-016         | 0.00E+000 | 7.48E-017 | 2.95E-018 |
|         | 40   | 2.90E-015         | 3.78E-015 | 8.85E-018 | 2.95E-017 |
|         | 45   | 1.11E-014         | 1.21E-014 | 5.90E-017 | 5.67E-016 |
|         | 48   | 6.04E-015         | 8.06E-015 | 3.54E-017 | 7.87E-017 |
|         | 51   | 1.05E-015         | 4.19E-015 | 1.96E-016 | 1.31E-016 |

**Table S2.** Rates of conversion between folding species U, I1, I2, F at different temperatures.
