# Supplementary material for: Mapping the Kinetic Barriers of a Large RNA Molecule's Folding Landscape
Source: PubMed Central journal article supplement (PMC3934814; doi:10.1371/journal.pone.0085041), 2014-02-25
Supplement: pone.0085041.s009.pdf [file pone.0085041.s009.pdf]

Supporting Information, **Table S3**

Title: Mapping the kinetic barriers of a large RNA molecule's folding landscape

Authors: Jörg C. Schlatterer, Joshua S. Martin, Alain L. Laederach, Michael Brenowitz

| Temperature in °C | Model 1 | Model 2 | Model 3 |
|-------------------|---------|---------|---------|
| 21.5              | 0.2618  | 0.1382  | 0.2962  |
| 25                | 0.1624  | 0.0446  | 0.2794  |
| 31                | 0.3002  | 0.0491  | 0.1018  |
| 36                | 0.1169  | 0.0198  | 0.1931  |
| 40                | 0.1512  | 0.0355  | 0.2247  |
| 45                | 0.1432  | 0.0336  | 0.0689  |
| 48                | 0.1235  | 0.0446  | 0.1265  |
| 51                | 0.1284  | 0.033   | 0.0642  |

**Table S3.** Errors for the standard fitting models according to Martin et al..<sup>2</sup>

Briefly, errors are calculated by summing how far each data set goes below zero and normalizing according to how many points are below zero. Model 2 features the smallest error and reflects the most likely model configuration that includes U, F, and two folding intermediates (I1 and I2).

(2) Martin, J. S.; Simmons, K.; Laederach, A. *Algorithms* 2009, 2, 200.
